# Supplementary material
Source: PubMed Central journal article supplement (PMC5042673)
Supplement: ASN.2015111210SupplementaryData.pdf [file ASN.2015111210SupplementaryData.pdf]

**Supplementary Table 1. rs667704 is associated with eQTLs for *CFHR1* and *CFHR3* within diverse human tissues (GTEx, reference 8)**

| <b>Gencode Id</b> | <b>Gene</b> | <b>SNP Id</b> | <b>P-Value</b> | <b>Effect Size</b> | <b>Tissue</b>                   |
|-------------------|-------------|---------------|----------------|--------------------|---------------------------------|
| ENSG00000116785.9 | CFHR3       | rs6677604     | 2.50E-19       | -0.72              | Thyroid                         |
| ENSG00000116785.9 | CFHR3       | rs6677604     | 3.00E-18       | -0.73              | Lung                            |
| ENSG00000244414.2 | CFHR1       | rs6677604     | 4.50E-16       | -0.97              | Liver                           |
| ENSG00000116785.9 | CFHR3       | rs6677604     | 3.00E-14       | -0.96              | Liver                           |
| ENSG00000116785.9 | CFHR3       | rs6677604     | 5.10E-13       | -0.9               | Adrenal Gland                   |
| ENSG00000116785.9 | CFHR3       | rs6677604     | 1.30E-12       | -0.58              | Nerve - Tibial                  |
| ENSG00000116785.9 | CFHR3       | rs6677604     | 2.20E-11       | -0.64              | Esophagus - Muscularis          |
| ENSG00000116785.9 | CFHR3       | rs6677604     | 5.00E-11       | -0.68              | Artery - Aorta                  |
| ENSG00000116785.9 | CFHR3       | rs6677604     | 1.10E-10       | -0.71              | Colon - Transverse              |
| ENSG00000116785.9 | CFHR3       | rs6677604     | 6.70E-09       | -0.61              | Esophagus - Mucosa              |
| ENSG00000116785.9 | CFHR3       | rs6677604     | 2.60E-08       | -0.67              | Prostate                        |
| ENSG00000116785.9 | CFHR3       | rs6677604     | 2.40E-07       | -0.67              | Stomach                         |
| ENSG00000116785.9 | CFHR3       | rs6677604     | 4.40E-07       | -0.68              | Adipose - Visceral (Omentum)    |
| ENSG00000244414.2 | CFHR1       | rs6677604     | 9.20E-07       | -0.29              | Cells - Transformed fibroblasts |
| ENSG00000244414.2 | CFHR1       | rs6677604     | 0.0000016      | -0.74              | Spleen                          |
| ENSG00000116785.9 | CFHR3       | rs6677604     | 0.0000016      | -0.45              | Breast - Mammary Tissue         |
| ENSG00000116785.9 | CFHR3       | rs6677604     | 0.0000019      | -0.64              | Artery - Coronary               |
| ENSG00000116785.9 | CFHR3       | rs6677604     | 0.0000021      | -0.52              | Heart - Atrial Appendage        |
| ENSG00000116785.9 | CFHR3       | rs6677604     | 0.0000029      | -0.72              | Spleen                          |
| ENSG00000177888.7 | ZBTB41      | rs6677604     | 0.000013       | -0.2               | Adipose - Subcutaneous          |
| ENSG00000244414.2 | CFHR1       | rs6677604     | 0.000021       | -0.33              | Nerve - Tibial                  |

**Supplementary Table 2. Study Cohorts**

|                         | Ancestry    | SNP genotyped (post-QC) |          |       | CNV genotyped (post-QC) |          |       |
|-------------------------|-------------|-------------------------|----------|-------|-------------------------|----------|-------|
|                         |             | Cases                   | Controls | Total | Cases                   | Controls | Total |
| <b>Shanghai cohort</b>  | Han Chinese | 735                     | 750      | 1,485 | 722                     | 750      | 1,472 |
| <b>Beijing cohort</b>   | Han Chinese | 1,194                   | 902      | 2,096 | 1,185                   | 882      | 2,067 |
| <b>Combined cohorts</b> | Han Chinese | 1,929                   | 1,652    | 3,581 | 1,907                   | 1,632    | 3,539 |

**Supplementary Table 3. Linkage disequilibrium between loci (Beijing cohort)**

|                | rs10801555 | rs10754199 | rs2019724 | rs6428357 | rs6677604 | rs379489 | rs2284664 | rs1329428 | rs1065489 | rs11582939 | <i>CFHR3</i> Δ | <i>CFHR1</i> Δ |
|----------------|------------|------------|-----------|-----------|-----------|----------|-----------|-----------|-----------|------------|----------------|----------------|
| rs10801555     |            | 1.000      | 0.990     | 0.990     | 0.005     | 0.983    | 0.042     | 0.057     | 0.080     | 0.080      | 0.005          | 0.005          |
| rs10754199     | 1.000      |            | 0.990     | 0.990     | 0.005     | 0.982    | 0.042     | 0.056     | 0.080     | 0.080      | 0.005          | 0.005          |
| rs2019724      | 1.000      | 1.000      |           | 1.000     | 0.005     | 0.993    | 0.042     | 0.057     | 0.081     | 0.081      | 0.005          | 0.005          |
| rs6428357      | 1.000      | 1.000      | 1.000     |           | 0.005     | 0.993    | 0.042     | 0.057     | 0.081     | 0.081      | 0.005          | 0.005          |
| rs6677604      | 1.000      | 1.000      | 1.000     | 1.000     |           | 0.005    | 0.029     | 0.079     | 0.058     | 0.057      | 0.949          | 0.757          |
| rs379489       | 0.993      | 0.993      | 1.000     | 1.000     | 1.000     |          | 0.044     | 0.059     | 0.081     | 0.081      | 0.005          | 0.005          |
| rs2284664      | 0.981      | 0.981      | 0.982     | 0.982     | 0.968     | 1.000    |           | 0.744     | 0.538     | 0.538      | 0.025          | 0.026          |
| rs1329428      | 0.986      | 0.986      | 0.987     | 0.987     | 1.000     | 1.000    | 0.999     |           | 0.725     | 0.724      | 0.078          | 0.055          |
| rs1065489      | 0.988      | 0.988      | 0.988     | 0.988     | 1.000     | 0.988    | 0.995     | 0.998     |           | 1.000      | 0.058          | 0.037          |
| rs11582939     | 0.988      | 0.988      | 0.988     | 0.988     | 1.000     | 0.988    | 0.995     | 0.998     | 1.000     |            | 0.058          | 0.037          |
| <i>CFHR3</i> Δ | 1.000      | 1.000      | 1.000     | 1.000     | 0.981     | 1.000    | 0.906     | 0.988     | 1.000     | 1.000      |                | 0.058          |
| <i>CFHR1</i> Δ | 1.000      | 1.000      | 1.000     | 1.000     | 0.923     | 1.000    | 0.864     | 0.789     | 0.753     | 0.752      | 1.000          |                |

Right upper: R-square, left bottom: D'

Supplementary Table 4A. Haplotypes analysis in the Beijing cohort

| Haplotype                     | Markers         |                 |                |                |                |               |                |                |                |                 |             |             | Freq. Cases | Freq. Controls                      | Individual OR (95% CI)              | Grouped OR (95% CI) |
|-------------------------------|-----------------|-----------------|----------------|----------------|----------------|---------------|----------------|----------------|----------------|-----------------|-------------|-------------|-------------|-------------------------------------|-------------------------------------|---------------------|
| <b>H1:</b> %                  | rs10801555<br>A | rs10754199<br>A | rs2019724<br>A | rs6428357<br>A | rs6677604<br>G | rs379489<br>T | rs2284664<br>G | rs1329428<br>G | rs1065489<br>G | rs11582939<br>C | CFHR3Δ<br>I | CFHR1Δ<br>I | 0.074       | 0.074                               | -reference-                         | -reference-         |
| <b>H2:</b> #                  | G               | G               | G              | G              | A              | C             | G              | A              | G              | C               | D           | D           | 0.036       | 0.068                               | 0.54 (0.38, 0.77)**                 | 0.52 (0.36, 0.74)** |
| <b>H3:</b>                    | G               | G               | G              | G              | G              | C             | A              | A              | G              | C               | D           | D           | 0           | 0.003                               | 0.14 (0.02, 1.25)                   |                     |
| <b>H4:</b>                    | G               | G               | G              | G              | G              | C             | G              | G              | T              | T               | I           | D           | 0.005       | 0.006                               | 0.88 (0.34, 2.32)                   | 0.92 (0.43, 1.96)   |
| <b>H5:</b>                    | G               | G               | G              | G              | G              | C             | A              | A              | G              | C               | I           | D           | 0.002       | 0.002                               | 0.99 (0.14, 6.88)                   |                     |
| <b>H6:</b>                    | G               | G               | G              | G              | A              | C             | G              | A              | G              | C               | D           | I           | 0.003       | 0.003                               | 0.82 (0.26, 2.63)                   | 0.79 (0.25, 2.53)   |
| <b>H7:</b> &                  | G               | G               | G              | G              | G              | C             | G              | G              | T              | T               | I           | I           | 0.522       | 0.467                               | 1.12 (0.88, 1.42)                   | 1.03 (0.82, 1.30)   |
| <b>H8:</b>                    | G               | G               | G              | G              | G              | C             | A              | A              | G              | C               | I           | I           | 0.339       | 0.354                               | 0.96 (0.75, 1.23)                   |                     |
| <b>H9:</b>                    | G               | G               | G              | G              | G              | C             | G              | A              | G              | C               | I           | I           | 0.014       | 0.018                               | 0.76 (0.44, 1.30)                   |                     |
| <b>H10:</b>                   | G               | G               | G              | G              | G              | C             | G              | G              | G              | C               | I           | I           | 0.004       | 0.003                               | 1.19 (0.42, 3.38)                   |                     |
| <b>Global Haplotype Test:</b> |                 |                 |                |                |                |               |                |                |                |                 |             |             |             | <b>P-value: 1.8*10<sup>-4</sup></b> | <b>P-value: 8.1*10<sup>-5</sup></b> |                     |

%: risk haplotype of AMD; #: protective haplotype of AMD and risk haplotype of aHUS; &: protective haplotype of N.meningitidis  
| implied this haplotype grouped with the one above it, a: I: wild type; D: deletion

Supplementary Table 4B. Haplotypes analysis in the Beijing cohort using the more common H8 haplotype for reference.

| Haplotype                     | Markers |            |   |            |   |           |   |           |   |                          |   |                          | Freq. Cases | Freq. Controls | Individual OR (95% CI) | Grouped OR (95% CI) |   |           |   |            |                       |                       |       |       |             |             |
|-------------------------------|---------|------------|---|------------|---|-----------|---|-----------|---|--------------------------|---|--------------------------|-------------|----------------|------------------------|---------------------|---|-----------|---|------------|-----------------------|-----------------------|-------|-------|-------------|-------------|
| <b>H8:</b>                    | G       | rs10801555 | G | rs10754199 | G | rs2019724 | G | rs6428357 | G | rs6677604                | C | rs379489                 | A           | rs2284664      | A                      | rs1329428           | G | rs1065489 | C | rs11582939 | <b>CFHR3</b> $\Delta$ | <b>CFHR1</b> $\Delta$ | 0.339 | 0.354 | -reference- | -reference- |
| <b>H2:</b> #                  | G       | G          | G | G          | A | C         | G | A         | G | C                        | D | D                        | 0.036       | 0.068          | 0.56 (0.42, 0.75)**    | 0.54 (0.41, 0.73)** |   |           |   |            |                       |                       |       |       |             |             |
| <b>H3:</b>                    | G       | G          | G | G          | G | C         | A | A         | G | C                        | D | D                        | 0           | 0.003          | 0.15 (0.02, 1.28)      |                     |   |           |   |            |                       |                       |       |       |             |             |
| <b>H4:</b>                    | G       | G          | G | G          | G | C         | G | G         | T | T                        | I | D                        | 0.005       | 0.006          | 0.92 (0.36, 2.35)      | 0.95 (0.46, 1.97)   |   |           |   |            |                       |                       |       |       |             |             |
| <b>H5:</b>                    | G       | G          | G | G          | G | C         | A | A         | G | C                        | I | D                        | 0.002       | 0.002          | 1.03 (0.15, 7.07)      |                     |   |           |   |            |                       |                       |       |       |             |             |
| <b>H6:</b>                    | G       | G          | G | G          | A | C         | G | A         | G | C                        | D | I                        | 0.003       | 0.003          | 0.85 (0.27, 2.68)      | 0.86 (0.27, 2.72)   |   |           |   |            |                       |                       |       |       |             |             |
| <b>H7:</b> &                  | G       | G          | G | G          | G | C         | G | G         | T | T                        | I | I                        | 0.522       | 0.467          | 1.16 (1.01, 1.33)      | 1.13 (0.99, 1.29)   |   |           |   |            |                       |                       |       |       |             |             |
| <b>H9:</b>                    | G       | G          | G | G          | G | C         | G | A         | G | C                        | I | I                        | 0.014       | 0.018          | 0.79 (0.47, 1.31)      |                     |   |           |   |            |                       |                       |       |       |             |             |
| <b>H10:</b>                   | G       | G          | G | G          | G | C         | G | G         | G | C                        | I | I                        | 0.004       | 0.003          | 1.23 (0.45, 3.42)      |                     |   |           |   |            |                       |                       |       |       |             |             |
| <b>H11:</b> %                 | A       | A          | A | A          | G | T         | G | G         | G | C                        | I | I                        | 0.074       | 0.074          | 1.02(0.79,1.3)         |                     |   |           |   |            |                       |                       |       |       |             |             |
| <b>Global Haplotype Test:</b> |         |            |   |            |   |           |   |           |   | <b>P-value: 1.9*10-4</b> |   | <b>P-value: 1.8*10-5</b> |             |                |                        |                     |   |           |   |            |                       |                       |       |       |             |             |

**Supplementary Table 5A** Allelic associations for rs6677604 and different copy number variants within *CFHR3* and *CFHR1* in the cohorts combined by meta-analysis.

| Cohorts Combined<br>N=3,539<br>1,907 cases/1,632 controls |                          |      |                        |      |      |
|-----------------------------------------------------------|--------------------------|------|------------------------|------|------|
|                                                           | MAF (cases<br>/controls) | OR   | P-value                | Q    | I    |
| <b>rs6677604 (A)</b>                                      | 0.044/0.071              | 0.61 | 2.5 x 10 <sup>-6</sup> | 0.22 | 33.3 |
| <b><i>CFHR3-CFHR1</i></b>                                 |                          |      |                        |      |      |
| <b>Del-Del</b>                                            | 0.040/0.070              | 0.57 | 1.3 x 10 <sup>-7</sup> | 0.25 | 25.2 |
| <b>Wt-Del</b>                                             | 0.0094/0.0098            | 0.99 | 0.98(NS)               | 0.67 | 0    |
| <b>Del-Wt</b>                                             | 0.0039/0.0037            | 1.11 | 0.78(NS)               | 0.34 | 0    |
| <b>Wt-Dup</b>                                             | 0.0037/0.0040            | 0.92 | 0.84(NS)               | 0.36 | 0    |

**Supplementary Table 5B** Conditional analysis rs6677604 and *CFHR3, IΔ* in the cohorts combined by meta-analysis.

| Cohorts Combined<br>N=3,539<br>1,907 cases/1,632 controls |                      |      |                        |      |      |
|-----------------------------------------------------------|----------------------|------|------------------------|------|------|
| Tested Variant                                            | Conditioning Variant | OR   | P-value                | Q    | I    |
| rs6677604                                                 | none                 | 0.61 | 2.5 x 10 <sup>-6</sup> | 0.22 | 33.3 |
| rs6677604                                                 | <i>ΔCFHR3/CFHR1</i>  | 1.29 | 0.41                   | 0.83 | 0    |
| <i>ΔCFHR3/CFHR1</i>                                       | none                 | 0.57 | 1.3 x 10 <sup>-7</sup> | 0.25 | 25.2 |
| <i>ΔCFHR3/CFHR1</i>                                       | rs6677604            | 0.45 | 0.01                   | 0.84 | 0    |

**Supplementary Table 6.** Pathology Oxford Scores by rs6677604.

| <b>Oxford Classification</b> | <b>rs6677604</b> |                     | <b>OR (95%CI)*</b> | <b>P-value*</b>        |
|------------------------------|------------------|---------------------|--------------------|------------------------|
|                              | <b>GG, N=531</b> | <b>AG /AA, N=84</b> |                    |                        |
| <b>M1 (%)</b>                | 228 (42.9)       | 24 (28.6)           | 0.73 (0.43,1.23)   | 0.25                   |
| <b>E1 (%)</b>                | 267 (50.3)       | 42 (50.0)           | 1.33 (0.82,2.16)   | 0.25                   |
| <b>S1 (%)</b>                | 381 (71.8)       | 52 (61.9)           | 0.65 (0.40,1.07)   | 8.4 x 10 <sup>-2</sup> |
| <b>T1 and T2 (%)</b>         | 169 (31.8)       | 21 (25.0)           | 0.55 (0.31,0.93)   | 3.0 x 10 <sup>-2</sup> |

M: Mesangial hypercellularity; E: Endocapillary hypercellularity; S: Segmental glomerulosclerosis; T: Tubular atrophy/interstitial fibrosis

\* Effect sizes and P-values were adjusted by the cohort membership

**Supplementary Table 7. Association by  $\Delta CFHR3, CFHR1$  with clinical parameters in the combined cohort**

|                                                      | <b>Wt/Wt</b>     | <b>Wt/Del and Del/Del</b> | <b>Effect Size*</b>   | <b>P-value*</b> |
|------------------------------------------------------|------------------|---------------------------|-----------------------|-----------------|
|                                                      | <b>(N=1,767)</b> | <b>(N=149)</b>            | <b>OR or Beta #</b>   |                 |
| <b>Gender [Male %]</b>                               | 958 (54.2)       | 73 (49.0)                 | 0.81 (0.58, 1.14)     | 0.23 (NS)       |
| <b>Age at biopsy (<math>\pm</math>s.d.), [years]</b> | 33.8 $\pm$ 11.7  | 34.7 $\pm$ 10.8           | 0.71 (-1.21, 2.63)    | 0.47(NS)        |
| <b>LN(eGFR) mean (<math>\pm</math>s.d.)</b>          | 4.3 $\pm$ 0.7    | 4.3 $\pm$ 0.7             | 0.03 (-0.08, 0.14) #  | 0.64 (NS)       |
| <b>SBP mean (<math>\pm</math>s.d.), [mm Hg]</b>      | 126.0 $\pm$ 18.8 | 125.4 $\pm$ 20.5          | -0.89 (-4.04, 2.25) # | 0.58 (NS)       |
| <b>DBP mean (<math>\pm</math>s.d.), [mm Hg]</b>      | 80.3 $\pm$ 13.2  | 80.2 $\pm$ 13.7           | -0.35 (-2.54, 1.84) # | 0.75 (NS)       |
| <b>Gross hematuria (%)</b>                           | 480 (27.4)       | 31 (20.9)                 | 0.73 (0.47, 1.09)     | 0.14 (NS)       |
| <b>Hyperuricemia (%)</b>                             | 518 (30.7)       | 39 (27.9)                 | 1.21 (0.82, 1.80)     | 0.35 (NS)       |
| <b>Urine protein groups</b>                          |                  |                           | -0.02 (-0.15, 0.11) # | 0.79 (NS)       |
| <b>Mild (&lt;1g/24h) (%)</b>                         | 711 (41.1)       | 65 (43.9)                 |                       |                 |
| <b>Moderate (1~3g/24h) (%)</b>                       | 654 (37.8)       | 51 (34.5)                 |                       |                 |
| <b>Severe (<math>\geq</math>3g/24h) (%)</b>          | 367 (21.2)       | 32 (21.6)                 |                       |                 |

\* Effect size and P-value was adjusted by the cohort membership



**Supplementary Table 8. Samples that failed quality control in MLPA analysis**

|                  | rs6677604 |    |    |       |
|------------------|-----------|----|----|-------|
|                  | AA        | AG | GG | Total |
| IgAN patients    | 0         | 4  | 18 | 22    |
| Healthy controls | 0         | 4  | 16 | 20    |
| Total            | 0         | 8  | 34 | 42    |

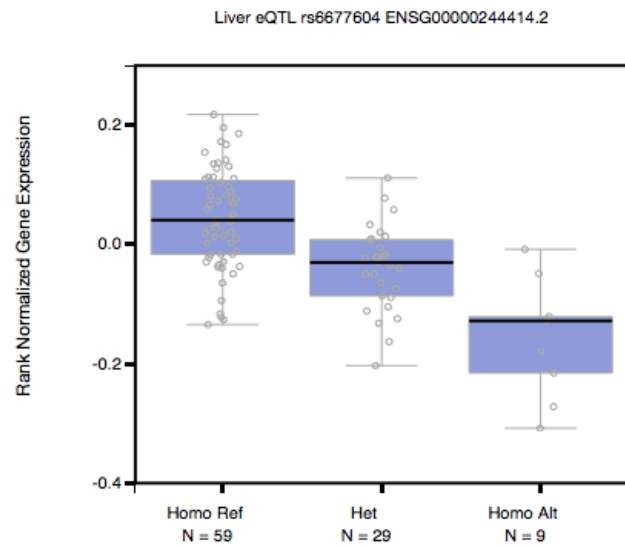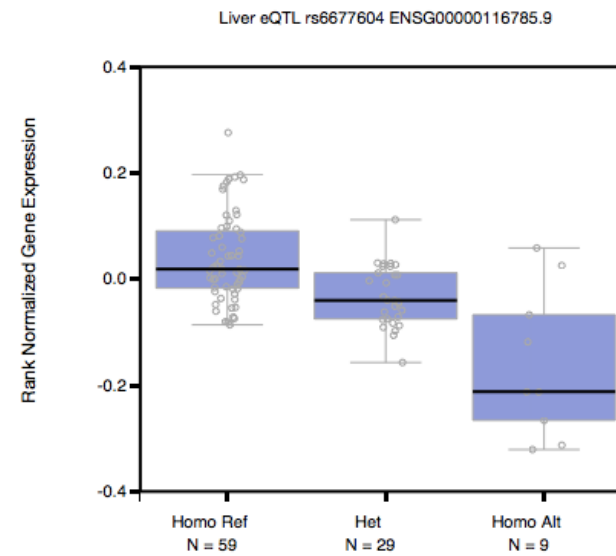

**Supplementary Figure 1. Liver eQTL box plots by rs6677604 genotype for CFHR1 (Left) and CFHR3 (right). Genotype and number of samples are shown on X-axis. The Y-axis shows the Normalized values for CFHR1 and CFHR3 expression. Data from GTEx (reference 8)**

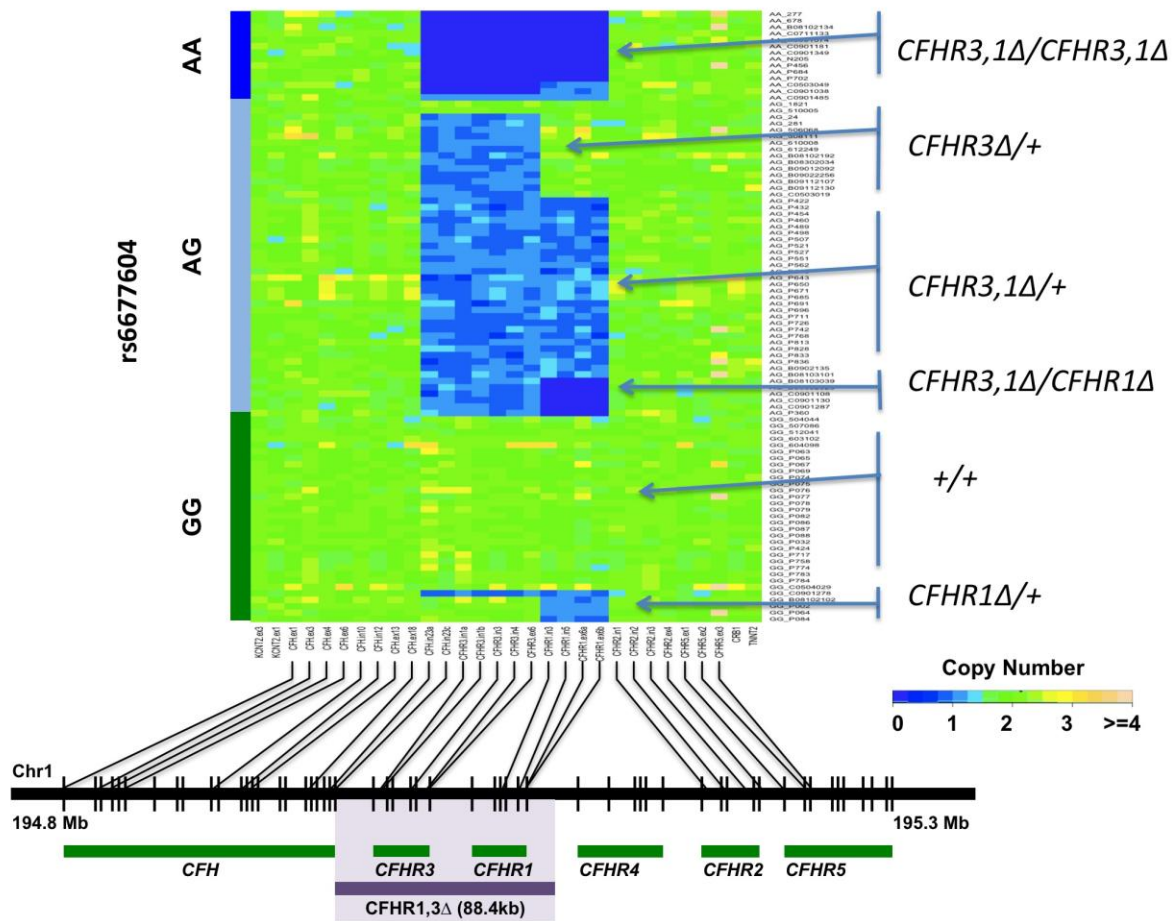

**Supplementary Figure 2.** MLPA analysis of the CFH gene cluster showing examples of CNV genotypes and association with rs6677604 genotype. Each row represents an individual sample. The samples are grouped by rs6677604 genotype, indicated on Y-axis. The X-axis show the distribution of the MLPA probes across the CFH gene cluster, with corresponding genes below. The heatmap shows the different copy number variants (CNVs) detected across the region. Homozygous deletions are in deep blue, heterozygous deletions are in light blue, copy neutral regions are in green. The CNV genotypes are indicated on the right (+ indicates copy neutral alleles)
